# Supplementary material
Source: MDPI journal article supplement (https://www.mdpi.com/2311-7524/9/1/119)
Supplement: s1 [file s1]

**Table S1. The gene-specific primers used in this study**

| gene             | Sequence of forward primer   | Sequence of reverse primer    |
|------------------|------------------------------|-------------------------------|
| <i>PgUGTE10</i>  | 5'- TCTTCTTCCACTTGCCGACC -3' | 5'- CGTTCCTGCGATCCTGAACT -3'  |
| <i>PgUGTE12</i>  | 5'- ACAGCGGATGGAACTCTGTG -3' | 5'- TCAGCTCTTCCACCAACGAC -3'  |
| <i>PgUGTE20</i>  | 5'- CGCCGATGATAGATGTGGCT -3' | 5'- ACCAACGCACCTATGTCCTG - 3' |
| <i>PgUGTE21</i>  | 5'- TCGCCTATCCATCACCTTGC -3' | 5'- GCTCTTGGAAGCGGATCTGT - 3' |
| <i>PgUGTL6</i>   | 5'- ACCCTAAGGACAAACTGCCG -3' | 5'- TCGAGTTCCACCCACAATGG - 3' |
| <i>PgUGTL11</i>  | 5'- TTCCCTATCGGAGCTTTGCC -3' | 5'- CCACTCGATGCAACTGTCCT - 3' |
| <i>PgUGTL12</i>  | 5'- AAGAACGAGGAGCAGAACCG -3' | 5'- AGTAGTGGTAGTAGGCGGCA - 3' |
| <i>PgUGTL13</i>  | 5'- ACCCTTTCATTCCGTGGGTC -3' | 5'- CCAAGAAGCAAGCACACGAC - 3' |
| <i>PgrActin7</i> | 5'- TATTGTTGGTCGTCCCAGGC -3' | 5'- CCTCTCTTCGATTGGGCCTC - 3' |
