# Supplementary material
Source: MDPI journal article supplement (https://www.mdpi.com/2311-7524/9/1/119)
Supplement: s1 [file s1]

**Table S3. Ka/Ks analysis of *PgUGT* duplicated genes**

| Duplicated gene pairs |             | Duplicated<br>type | Ka        | Ks      | Ka/Ks   | Purifying<br>selection |
|-----------------------|-------------|--------------------|-----------|---------|---------|------------------------|
| Pgr013573.1           | Pgr004004.1 | Segmental          | 0.5396443 | 2.49278 | 0.21648 | Yes                    |
| Pgr014646.1           | Pgr008782.1 | Segmental          | 0.4072405 | 1.75570 | 0.23195 | Yes                    |
| Pgr022566.1           | Pgr025860.1 | Segmental          | 0.3636103 | 2.19696 | 0.16550 | Yes                    |
| Pgr004136.1           | Pgr003390.1 | Segmental          | 0.4051909 | 4.26268 | 0.09505 | Yes                    |
| Pgr007463.1           | Pgr002854.1 | Segmental          | 0.4671641 | 2.61002 | 0.17898 | Yes                    |
| Pgr022563.1           | Pgr007805.1 | Segmental          | 0.5704702 | 3.26339 | 0.17480 | Yes                    |
| Pgr010381.1           | Pgr025860.1 | Segmental          | 0.4132339 | 2.08219 | 0.19846 | Yes                    |
