# Supplementary material
Source: MDPI journal article supplement (https://www.mdpi.com/2311-7524/9/1/119)
Supplement: s1 [file s1]

**Table S4. The functional annotation of the genes which co-expressed with the candidate *PgUGT* genes**

| Gene        | KEGG Orthology                                                                                                                                                                                                                                                       |
|-------------|----------------------------------------------------------------------------------------------------------------------------------------------------------------------------------------------------------------------------------------------------------------------|
| Pgr001107.1 | K14503 1 2e-41 170 tcc:TCM_033994 brassinosteroid resistant 1/2                                                                                                                                                                                                      |
| Pgr028018.1 | K14497 1 8e-96 350 egr:104443989 protein phosphatase 2C [EC:3.1.3.16]                                                                                                                                                                                                |
| Pgr011628.1 | K14486 1 5e-14 76.3 pop:POPTR_0004s23770g auxin response factor                                                                                                                                                                                                      |
| Pgr000815.1 | K14484 1 2e-49 195 fve:101293288 auxin-responsive protein IAA                                                                                                                                                                                                        |
| Pgr001775.2 | K14514 1 8e-121 434 egr:104420242 ethylene-insensitive protein 3                                                                                                                                                                                                     |
| Pgr001703.1 | K14487 1 0.0 1011 tcc:TCM_007172 auxin responsive GH3 gene family                                                                                                                                                                                                    |
| Pgr002113.1 | K14488 1 1e-41 167 pper:PRUPE_ppa026695mg SAUR family protein                                                                                                                                                                                                        |
| Pgr003031.1 | K14432 1 1e-89 330 cic:CICLE_v10012205mg ABA responsive element binding factor                                                                                                                                                                                       |
| Pgr003425.1 | K14498 1 0.0 691 tcc:TCM_006995 serine/threonine-protein kinase SRK2 [EC:2.7.11.1]                                                                                                                                                                                   |
| Pgr007109.1 | K14494 1 2e-87 323 pvu:PHAVU_003G208600g DELLA protein                                                                                                                                                                                                               |
| Pgr007485.1 | K14431 1 8e-16 84.0 cit:102627632 transcription factor TGA                                                                                                                                                                                                           |
| Pgr010226.1 | K14486 1 4e-149 528 pper:PRUPE_ppa022314mg auxin response factor                                                                                                                                                                                                     |
| Pgr011976.1 | K14514 1 1e-16 89.4 smo:SELMODRAFT_419761 ethylene-insensitive protein 3                                                                                                                                                                                             |
| Pgr012247.1 | K14431 1 6e-13 74.7 obr:102718125 transcription factor TGA                                                                                                                                                                                                           |
| Pgr013258.3 | K14488 1 2e-54 211 vvi:100266455 SAUR family protein                                                                                                                                                                                                                 |
| Pgr013873.1 | K14431 1 8e-16 84.7 crb:CARUB_v10001409mg transcription factor TGA                                                                                                                                                                                                   |
| Pgr018708.1 | K14496 1 6e-83 307 sly:101268417 abscisic acid receptor PYR/PYL family                                                                                                                                                                                               |
| Pgr024252.1 | K01850 1 1e-119 429 mdm:103402853 chorismate mutase [EC:5.4.99.5]                                                                                                                                                                                                    |
| Pgr020839.1 | K09755 1 0.0 838 fve:101307828 ferulate-5-hydroxylase [EC:1.14.-.-]                                                                                                                                                                                                  |
| Pgr016981.1 | K05349 1 9e-63 242 mdm:103410473 beta-glucosidase [EC:3.2.1.21];K04730 3 3e-39 163 aly:ARALYDRAFT_667762 interleukin-1 receptor-associated kinase 1 [EC:2.7.11.1];K04733 5 4e-37 156 pper:PRUPE_ppa004552mg interleukin-1 receptor-associated kinase 4 [EC:2.7.11.1] |
| Pgr016121.1 | K09753 1 6e-78 291 bdi:100832790 cinnamoyl-CoA reductase [EC:1.2.1.44]                                                                                                                                                                                               |
| Pgr014360.1 | K13065 1 5e-40 164 rcu:RCOM_1600120 shikimate O-hydroxycinnamoyl transferase [EC:2.3.1.133]                                                                                                                                                                          |
| Pgr013400.1 | K00083 1 5e-139 494 egr:104442826 cinnamyl-alcohol dehydrogenase [EC:1.1.1.195]                                                                                                                                                                                      |
| Pgr011699.1 | K14454 1 4e-160 564 egr:104436950 aspartate aminotransferase, cytoplasmic [EC:2.6.1.1]                                                                                                                                                                               |
| Pgr011171.1 | K11188 1 2e-102 371 egr:104453606 peroxiredoxin 6, 1-Cys peroxiredoxin [EC:1.11.1.7 1.11.1.15 3.1.1.-]                                                                                                                                                               |
| Pgr009542.1 | K01188 1 0.0 808 tcc:TCM_011571 beta-glucosidase [EC:3.2.1.21]                                                                                                                                                                                                       |
| Pgr006318.1 | K00083 1 9e-157 553 rcu:RCOM_0366700 cinnamyl-alcohol dehydrogenase [EC:1.1.1.195]                                                                                                                                                                                   |

|             |                                                                                       |
|-------------|---------------------------------------------------------------------------------------|
| Pgr006319.1 | K00083 1 4e-157 554 rcu:RCOM_0366700 cinnamyl-alcohol dehydrogenase<br>[EC:1.1.1.195] |
|-------------|---------------------------------------------------------------------------------------|
