# Supplementary material
Source: MDPI journal article supplement (https://www.mdpi.com/2311-7524/9/1/119)
Supplement: s1 [file s1]

**Table S2. Detailed information of PgUGTs identified in the pomegranate genome**

| Gene ID     | Gene Name | Protein Length<br>(aa) | MW (kDa) | pI   |
|-------------|-----------|------------------------|----------|------|
| Pgr022754.1 | PgUGTA1   | 492                    | 55887.42 | 6.48 |
| Pgr022752.1 | PgUGTA2   | 245                    | 27313.35 | 5.84 |
| Pgr013417.1 | PgUGTA3   | 474                    | 53656.55 | 5.65 |
| Pgr013416.1 | PgUGTA4   | 474                    | 53399.35 | 5.74 |
| Pgr013419.1 | PgUGTA5   | 422                    | 47703.54 | 5.32 |
| Pgr011472.1 | PgUGTA6   | 472                    | 53095.50 | 5.23 |
| Pgr019189.1 | PgUGTA7   | 435                    | 48618.45 | 6.4  |
| Pgr016660.1 | PgUGTA8   | 466                    | 52082.96 | 6.18 |
| Pgr016659.1 | PgUGTA9   | 466                    | 52110.12 | 5.77 |
| Pgr016661.1 | PgUGTA10  | 467                    | 52379.39 | 5.38 |
| Pgr016662.1 | PgUGTA11  | 467                    | 52023.79 | 5.45 |
| Pgr016790.1 | PgUGTA12  | 453                    | 50569.30 | 5.88 |
| Pgr007463.1 | PgUGTA13  | 439                    | 48594.02 | 5.88 |
| Pgr009508.1 | PgUGTB1   | 467                    | 51301.90 | 5.85 |
| Pgr009507.1 | PgUGTB2   | 471                    | 51683.53 | 6.02 |
| Pgr014646.1 | PgUGTB3   | 460                    | 49719.26 | 5.3  |
| Pgr008778.1 | PgUGTB4   | 496                    | 53896.26 | 5.79 |
| Pgr008782.1 | PgUGTB5   | 465                    | 50849.49 | 5.14 |
| Pgr008781.1 | PgUGTB6   | 472                    | 51754.62 | 6.01 |
| Pgr008780.1 | PgUGTB7   | 478                    | 52503.37 | 6.1  |

|             |          |     |          |      |
|-------------|----------|-----|----------|------|
| Pgr028764.1 | PgUGTC1  | 488 | 53579.81 | 5.94 |
| Pgr028761.1 | PgUGTC2  | 489 | 53982.72 | 5.44 |
| Pgr005743.1 | PgUGTC3  | 464 | 51760.56 | 5.72 |
| Pgr027032.1 | PgUGTD1  | 489 | 54898.36 | 5.23 |
| Pgr002034.1 | PgUGTD2  | 491 | 54498.78 | 5.83 |
| Pgr002032.1 | PgUGTD5  | 502 | 57104.80 | 6.36 |
| Pgr002033.1 | PgUGTD6  | 501 | 56769.21 | 5.52 |
| Pg011918.1  | PgUGTD3  | 467 | 52032.52 | 5.86 |
| Pgr002035.1 | PgUGTD4  | 466 | 51845.26 | 5.88 |
| Pgr003384.1 | PgUGTD7  | 487 | 53617.07 | 5.82 |
| Pgr003386.3 | PgUGTD9  | 491 | 55330.58 | 5.68 |
| Pgr003390.1 | PgUGTD10 | 492 | 55373.76 | 6.02 |
| Pgr003391.1 | PgUGTD11 | 466 | 52236.77 | 5.57 |
| Pgr004136.1 | PgUGTD8  | 487 | 54535.64 | 5.98 |
| Pgr004140.1 | PgUGTD12 | 496 | 55924.18 | 6.1  |
| Pgr004550.1 | PgUGTE1  | 476 | 52305.94 | 5.88 |
| Pgr004549.1 | PgUGTE2  | 468 | 51450.85 | 5.41 |
| Pgr005094.1 | PgUGTE3  | 492 | 55204.43 | 6.1  |
| Pgr014181.1 | PgUGTE4  | 492 | 54871.34 | 7.77 |
| Pgr017076.1 | PgUGTE5  | 491 | 54384.38 | 6.07 |
| Pgr013575.1 | PgUGTE6  | 471 | 51761.06 | 8.7  |
| Pgr013573.1 | PgUGTE7  | 487 | 54000.87 | 5.88 |
| Pgr013574.1 | PgUGTE8  | 495 | 54463.15 | 5.44 |

|             |          |      |           |      |
|-------------|----------|------|-----------|------|
| Pgr004004.1 | PgUGTE9  | 502  | 55001.11  | 5.12 |
| Pgr023634.1 | PgUGTE10 | 477  | 52222.99  | 5.43 |
| Pgr023009.1 | PgUGTE11 | 484  | 52744.48  | 5.61 |
| Pgr023010.1 | PgUGTE12 | 488  | 53498.46  | 5.37 |
| Pgr023011.1 | PgUGTE13 | 479  | 51818.95  | 6.32 |
| Pgr023014.1 | PgUGTE14 | 510  | 55502.52  | 6.03 |
| Pgr023012.1 | PgUGTE15 | 509  | 55417.19  | 5.9  |
| Pgr023013.1 | PgUGTE16 | 506  | 55275.93  | 5.22 |
| Pgr013915.1 | PgUGTE17 | 493  | 54008.37  | 6.42 |
| Pgr027878.1 | PgUGTE18 | 465  | 50914.66  | 5.71 |
| Pgr027880.1 | PgUGTE19 | 483  | 52895.61  | 5.46 |
| Pgr007593.1 | PgUGTE20 | 478  | 52530.93  | 5.15 |
| Pgr007594.1 | PgUGTE21 | 486  | 53693.55  | 5.37 |
| Pgr025629.1 | PgUGTE22 | 1364 | 151212.96 | 6.23 |
| Pgr024933.1 | PgUGTE23 | 478  | 52766.37  | 5.26 |
| Pgr022819.1 | PgUGTF1  | 518  | 55907.93  | 6.55 |
| Pgr022159.4 | PgUGTF2  | 507  | 54606.84  | 6.6  |
| Pgr010547.1 | PgUGTF3  | 449  | 49181.68  | 5.82 |
| Pgr008211.1 | PgUGTF4  | 460  | 50193.55  | 5.02 |
| Pgr000972.3 | PgUGTF5  | 456  | 50441.65  | 5.93 |
| Pgr000984.1 | PgUGTF6  | 469  | 51919.38  | 5.52 |
| Pgr006271.1 | PgUGTG1  | 483  | 54002.59  | 5.99 |

|             |          |     |          |      |
|-------------|----------|-----|----------|------|
| Pgr006273.1 | PgUGTG2  | 483 | 53980.50 | 6.25 |
| Pgr006272.1 | PgUGTG3  | 483 | 54307.93 | 6.18 |
| Pgr006267.1 | PgUGTG4  | 483 | 54042.10 | 5.67 |
| Pgr006269.1 | PgUGTG5  | 485 | 53961.13 | 5.99 |
| Pgr023854.1 | PgUGTG6  | 484 | 54365.59 | 5.44 |
| Pgr024462.1 | PgUGTG7  | 375 | 41920.44 | 6.27 |
| Pgr006268.1 | PgUGTG8  | 375 | 41920.44 | 6.27 |
| Pgr006266.1 | PgUGTG9  | 558 | 62238.40 | 5.91 |
| Pgr016439.3 | PgUGTG10 | 472 | 52521.30 | 5.61 |
| Pgr017138.1 | PgUGTG11 | 481 | 54695.61 | 5.19 |
| Pgr001319.1 | PgUGTG12 | 486 | 55130.99 | 5.45 |
| Pgr008150.1 | PgUGTG13 | 482 | 54050.99 | 5.22 |
| Pgr016096.1 | PgUGTG14 | 491 | 55366.32 | 5.61 |
| Pgr029226.1 | PgUGTG15 | 489 | 54631.69 | 5.52 |
| Pgr010837.1 | PgUGTG16 | 488 | 54423.81 | 5.5  |
| Pgr026922.1 | PgUGTG17 | 487 | 54359.71 | 5.6  |
| Pgr028826.1 | PgUGTG18 | 471 | 52256.37 | 5.23 |
| Pgr028824.1 | PgUGTG19 | 480 | 53859.09 | 6.03 |
| Pgr026923.1 | PgUGTG20 | 635 | 70163.69 | 6.18 |
| Pgr026926.1 | PgUGTG21 | 442 | 48865.53 | 5.98 |
| Pgr025860.1 | PgUGTH1  | 457 | 51185.79 | 5.58 |
| Pgr022566.1 | PgUGTH2  | 461 | 51332.02 | 5.75 |

|             |          |     |          |      |
|-------------|----------|-----|----------|------|
| Pgr025855.1 | PgUGTH3  | 450 | 50533.11 | 7.93 |
| Pgr025859.2 | PgUGTH4  | 459 | 51541.28 | 5.71 |
| Pgr024958.1 | PgUGTH5  | 469 | 52840.39 | 6.71 |
| Pgr010383.1 | PgUGTH6  | 451 | 50267.04 | 5.91 |
| Pgr019103.1 | PgUGTH7  | 492 | 54478.62 | 5.95 |
| Pgr020500.1 | PgUGTI1  | 457 | 51055.08 | 5.53 |
| Pgr004601.1 | PgUGTI2  | 433 | 48091.64 | 8.2  |
| Pgr010311.1 | PgUGTJ1  | 487 | 54033.07 | 5.93 |
| Pgr024899.1 | PgUGTJ2  | 503 | 56646.29 | 5.27 |
| Pgr004943.1 | PgUGTL9  | 423 | 47582.95 | 4.85 |
| Pgr011620.1 | PgUGTL7  | 475 | 53061.16 | 5.46 |
| Pgr027142.2 | PgUGTL8  | 408 | 45569.11 | 4.87 |
| Pgr004941.1 | PgUGTL10 | 478 | 53098.31 | 5.25 |
| Pgr028533.1 | PgUGTL11 | 524 | 57684.06 | 4.79 |
| Pgr028532.1 | PgUGTL12 | 517 | 57290.81 | 5.53 |
| Pgr003363.1 | PgUGTL13 | 506 | 56129.43 | 5.63 |
| Pgr014775.1 | PgUGTL6  | 465 | 51451.61 | 5.34 |
| Pgr010803.1 | PgUGTL2  | 458 | 50918.85 | 5.51 |
| Pgr010802.1 | PgUGTL3  | 459 | 51593.35 | 5.17 |
| Pgr010800.1 | PgUGTL1  | 476 | 53289.23 | 5.45 |
| Pgr020018.1 | PgUGTL4  | 464 | 51745.18 | 5.16 |
| Pgr010806.1 | PgUGTL5  | 462 | 51802.14 | 5.07 |

|             |         |     |          |      |
|-------------|---------|-----|----------|------|
| Pgr025407.1 | PgUGTM1 | 511 | 56627.67 | 5.3  |
| Pgr000397.1 | PgUGTM2 | 505 | 55996.34 | 6.29 |
| Pgr007605.1 | PgUGTN1 | 477 | 53753.76 | 5.32 |
| Pgr028726.1 | PgUGTR1 | 474 | 51121.02 | 5.93 |
| Pgr028727.1 | PgUGTR2 | 518 | 55835.83 | 6.29 |
| Pgr028728.1 | PgUGTR3 | 494 | 54086.07 | 6.81 |
| Pgr023499.1 | PgUGTR4 | 487 | 53818.76 | 5.61 |
| Pgr007805.1 | PgUGTp1 | 487 | 54526.74 | 5.61 |
| Pgr013418.2 | PgUGTp2 | 453 | 50745.53 | 5.5  |
| Pgr022564.1 | PgUGTp3 | 522 | 57778.36 | 5.7  |
| Pgr022565.1 | PgUGTp4 | 481 | 53961.54 | 5.42 |

---
